# Supplementary material for: 4-Cyanopyridine complexes [MX2(4-CNpy)x]n (with X = Cl, Br and x = 1, 2): crystal structures, thermal properties and a comparison with [MX2(3-CNpy)x]n complexes
Source: Royal Society of Chemistry journal article supplement (doi:10.1039/c9ce02012h), 2020-01-01
Supplement: c9ce02012h1.pdf [file c9ce02012h1.pdf]

CCDC numbers list for *CrystEngComm*

**4-Cyanopyridine complexes [MX<sub>2</sub>(4-CNpy)<sub>x</sub>]<sub>n</sub> (with X = Cl, Br and x = 1, 2):  
Crystal structures, thermal properties and comparison with [MX<sub>2</sub>(3-CNpy)<sub>x</sub>]<sub>n</sub>  
complexes.**

Miriam Heine, Lothar Fink, Martin U. Schmidt\*

Institute of Inorganic and Analytical Chemistry, Goethe University, Max-von-Laue-Str. 7, 60438  
Frankfurt am Main, Germany. E-Mail: heine@chemie.uni-frankfurt.de, fink@chemie.uni-frankfurt.de,  
m.schmidt@chemie.uni-frankfurt.de; Fax: +49 69798 29235; Tel: +49 69798 29171

**CCDC numbers – list of collection codes**

| <b>Compound</b>                                                   | <b>Collection code</b> |
|-------------------------------------------------------------------|------------------------|
| <b>Manganese</b>                                                  |                        |
| $\beta$ -[MnBr <sub>2</sub> (4-CNpy) <sub>2</sub> ] <sub>n</sub>  | 1956119                |
| $\gamma$ -[MnBr <sub>2</sub> (4-CNpy) <sub>2</sub> ] <sub>n</sub> | 1956120                |
| [MnBr <sub>2</sub> (4-CNpy) <sub>1</sub> ] <sub>n</sub>           | 1956118                |
| <b>Iron</b>                                                       |                        |
| [FeCl <sub>2</sub> (4-CNpy) <sub>2</sub> ] <sub>n</sub>           | 1956117                |
| [FeCl <sub>2</sub> (4-CNpy) <sub>1</sub> ] <sub>n</sub>           | 1956116                |
| [FeBr <sub>2</sub> (4-CNpy) <sub>2</sub> ] <sub>n</sub>           | 1956115                |
| [FeBr <sub>2</sub> (4-CNpy) <sub>1</sub> ] <sub>n</sub>           | 1956114                |
| <b>Cobalt</b>                                                     |                        |
| [CoCl <sub>2</sub> (4-CNpy) <sub>2</sub> ] <sub>n</sub>           | 1956112                |
| [CoCl <sub>2</sub> (4-CNpy) <sub>1</sub> ] <sub>n</sub>           | 1956126                |
| [CoBr <sub>2</sub> (4-CNpy) <sub>1</sub> ] <sub>n</sub>           | 1956111                |
| <b>Copper</b>                                                     |                        |
| [CuBr <sub>2</sub> (4-CNpy) <sub>2</sub> ] <sub>n</sub>           | 1956113                |
| <b>Zinc</b>                                                       |                        |
| $\alpha$ -[ZnBr <sub>2</sub> (4-CNpy) <sub>2</sub> ]              | 1956121                |
| $\beta$ -[ZnBr <sub>2</sub> (4-CNpy) <sub>2</sub> ]               | 1956122                |
