# Supplementary material for: 4-Cyanopyridine complexes [MX2(4-CNpy)x]n (with X = Cl, Br and x = 1, 2): crystal structures, thermal properties and a comparison with [MX2(3-CNpy)x]n complexes
Source: Royal Society of Chemistry journal article supplement (doi:10.1039/c9ce02012h), 2020-01-01
Supplement: c9ce02012h3.zip [file c9ce02012h3.zip]

**4-Cyanopyridine complexes  $[MX_2(4-CNpy)_x]_n$  (with X = Cl, Br and x = 1, 2):**  
**Crystal structures, thermal properties and comparison with  $[MX_2(3-CNpy)_x]_n$**   
**complexes.**

Miriam Heine, Lothar Fink, Martin U. Schmidt\*

Institute of Inorganic and Analytical Chemistry, Goethe University, Max-von-Laue-Str. 7, 60438 Frankfurt am Main, Germany. E-Mail: heine@chemie.uni-frankfurt.de, fink@chemie.uni-frankfurt.de, m.schmidt@chemie.uni-frankfurt.de; Fax: +49 69798 29235; Tel: +49 69798 29171

**CCDC numbers – list of collection codes**

| Compound                                                          | Collection code |
|-------------------------------------------------------------------|-----------------|
| <b>Manganese</b>                                                  |                 |
| $\beta$ -[MnBr <sub>2</sub> (4-CNpy) <sub>2</sub> ] <sub>n</sub>  | 1956119         |
| $\gamma$ -[MnBr <sub>2</sub> (4-CNpy) <sub>2</sub> ] <sub>n</sub> | 1956120         |
| [MnBr <sub>2</sub> (4-CNpy) <sub>1</sub> ] <sub>n</sub>           | 1956118         |
| <b>Iron</b>                                                       |                 |
| [FeCl <sub>2</sub> (4-CNpy) <sub>2</sub> ] <sub>n</sub>           | 1956117         |
| [FeCl <sub>2</sub> (4-CNpy) <sub>1</sub> ] <sub>n</sub>           | 1956116         |
| [FeBr <sub>2</sub> (4-CNpy) <sub>2</sub> ] <sub>n</sub>           | 1956115         |
| [FeBr <sub>2</sub> (4-CNpy) <sub>1</sub> ] <sub>n</sub>           | 1956114         |
| <b>Cobalt</b>                                                     |                 |
| [CoCl <sub>2</sub> (4-CNpy) <sub>2</sub> ] <sub>n</sub>           | 1956112         |
| [CoCl <sub>2</sub> (4-CNpy) <sub>1</sub> ] <sub>n</sub>           | 1956126         |
| [CoBr <sub>2</sub> (4-CNpy) <sub>1</sub> ] <sub>n</sub>           | 1956111         |
| <b>Copper</b>                                                     |                 |
| [CuBr <sub>2</sub> (4-CNpy) <sub>2</sub> ] <sub>n</sub>           | 1956113         |
| <b>Zinc</b>                                                       |                 |
| $\alpha$ -[ZnBr <sub>2</sub> (4-CNpy) <sub>2</sub> ]              | 1956121         |
| $\beta$ -[ZnBr <sub>2</sub> (4-CNpy) <sub>2</sub> ]               | 1956122         |
